# Supplementary material for: Precision and Accuracy Assessment of Cephalometric Analyses Performed by Deep Learning Artificial Intelligence with and without Human Augmentation
Source: Preprints.org preprint supplement (doi:10.20944/preprints202305.0391.v1), 2023-05-06
Supplement: Supplementary file 1 [file supplementary]

**Table S1.** Cephalometric measurements and their definitions.

| Category                   | Measurement                                 | Definition                                                                                                                                             |
|----------------------------|---------------------------------------------|--------------------------------------------------------------------------------------------------------------------------------------------------------|
| Maxilla to Cranial Base    | SNA (°)                                     | The angle formed by connecting sella, nasion, and A-point                                                                                              |
|                            | SN-Palatal Plane (°)                        | The angle formed from the intersection of sella-nasion line and a line drawn connecting anterior nasal spine to posterior nasal spine                  |
| Mandible to Cranial Base   | SNB (°)                                     | The angle formed by connecting sella, nasion, and B-point                                                                                              |
|                            | FMA: MP-FH (°)                              | The angle formed from the intersection of porion-orbitale line and a line drawn connecting gonion to gnathion                                          |
|                            | SN-MP (°)                                   | The angle formed from the intersection of sella-nasion line and a line drawn connecting gonion to gnathion                                             |
|                            | Y-Axis: SGn-SN (°)                          | The angle formed by connecting nasion, sella, and gnathion                                                                                             |
| Maxilla to Mandible        | ANB (°)                                     | The difference between SNA and SNB                                                                                                                     |
|                            | Maxillary Length: ANS-PNS (mm)              | The linear measurement between anterior nasal spine and posterior nasal spine                                                                          |
|                            | Mandibular Length: Co-Gn (mm)               | The linear measurement between condyion and gnathion                                                                                                   |
| Cranial Base               | Cranial Base Flexure Angle: Ba-S-N (°)      | The angle formed by connecting basion, sella, and nasion                                                                                               |
| Upper Incisors to Maxilla  | U1-SN (°)                                   | The angle formed from a line connecting sella to nasion and a line connecting the upper incisor incisal tip to the root apex                           |
|                            | U1-NA (°)                                   | The angle formed from a line connecting nasion to A-point and a line connecting the upper incisor incisal tip to the root apex                         |
|                            | U1-NA (mm)                                  | The linear measurement from the labial surface of the upper incisor to the line connecting nasion to A-point                                           |
| Lower Incisors to Mandible | L1-MP (°)                                   | The angle formed from a line connecting the lower incisor incisal tip to the root apex and a line connecting gonion to gnathion                        |
|                            | L1-NB (°)                                   | The angle formed from a line connecting the lower incisor incisal tip to the root apex and a line connecting nasion to B-point                         |
|                            | L1-NB (mm)                                  | The linear measurement from the labial surface of the lower incisor incisal to the line connecting nasion to B-point                                   |
| Incisors to Each Other     | Interincisal Angle (°)                      | The angle formed from a line connecting the lower incisor incisal tip to the apex and a line connecting the upper incisor incisal tip to the root apex |
| Soft Tissue                | Upper Lip to E-Plane (mm)                   | The linear distance from upper lip to a line connecting soft tissue pogonion and pronasale                                                             |
|                            | Lower Lip to E-Plane (mm)                   | The linear distance from lower lip to a line connecting soft tissue pogonion and pronasale                                                             |
|                            | Soft Tissue Upper Face Height: N'-Sn' (mm)  | The linear measurement between soft tissue nasion and soft tissue subnasale                                                                            |
|                            | Soft Tissue Lower Face Height: Sn'-Me' (mm) | The linear measurement between soft tissue subnasale and soft tissue pogonion                                                                          |
|                            | Hard Tissue Upper Face Height: N-ANS (mm)   | The linear measurement between nasion and anterior nasal spine                                                                                         |
|                            | Hard Tissue Lower Face Height: ANS-Me (mm)  | The linear measurement between anterior nasal spine and menton                                                                                         |
|                            | Posterior Face Height: Ar-Go (mm)           | The linear measurement between articulare and gonion                                                                                                   |
|                            |                                             |                                                                                                                                                        |
| Profile                    | Convexity: NA-APo (°)                       | The angle formed by connecting nasion, A-point, and pogonion                                                                                           |
|                            | Facial Angle: FH-NPo (°)                    | The angle formed from a line connecting porion to orbitale and a line connecting nasion to pogonion                                                    |
